# Supplementary material for: N-doped Ti3C2-reinforced porous g-C3N4 for photocatalytic contaminants degradation and nitrogen reduction
Source: Royal Society of Chemistry journal article supplement (doi:10.1039/d4dt01031k), 2024-01-01
Supplement: d4dt01031k1.pdf [file d4dt01031k1.pdf]

## **N-doped Ti<sub>3</sub>C<sub>2</sub>-reinforced porous g-C<sub>3</sub>N<sub>4</sub> for photocatalytic contaminants degradation and nitrogen reduction**

Ziyang Li <sup>a</sup>, Mingxuan Sun <sup>a\*</sup>, Haohao Chen <sup>a</sup>, Junjie Zhao <sup>a</sup>, Xiangzhi Huang <sup>a</sup>, Yu Gao <sup>a</sup>, Huanying Teng <sup>a</sup>, Chen Chen <sup>a</sup>

<sup>a</sup> School of Materials Science and Engineering, Shanghai University of Engineering Science, Shanghai 201620, P. R. China

\*Corresponding author E-mail: mingxuansun@sues.edu.cn; smxalan@163.com

### **Equations:**

1. The conversion between reversible hydrogen electrode (RHE) and saturated calomel electrode (SCE)

$$E_{(\text{RHE})} = E_{(\text{SCE})} + 0.242 + 0.0591 \times (\text{pH})$$

$$E_{(\text{NHE})} = E_{(\text{SCE})} + 0.242$$

2. Optical band gap ( $E_g$ )

$$\alpha h\nu = (h\nu - E_g)^n$$

$\alpha$  and  $h\nu$  are respectively absorption and photon energy.  $n=2$  and  $1/2$  are respectively corresponded to indirect and direct gap.

3. Turnover frequency (TOF)

$$\text{TOF} = \frac{jAM}{4Fm}$$

Where  $j$  is the current density ( $\text{mA cm}^{-2}$ ) at a given overpotential,  $A$  is electrode area,  $n$ ,  $F$ ,  $m$ ,  $M$  are molar concentration of catalyst and Faraday constant ( $96485 \text{ C}\cdot\text{mol}^{-1}$ ), mass loading of the catalyst ( $\text{mg cm}^{-2}$ ), and molecular weight of the catalyst, respectively respectively.

**Table S1**

**Table S1** Photocatalytic performance of TCCN-1 in this paper and other reported g-C<sub>3</sub>N<sub>4</sub>-based photocatalysts.

| <b>Photocatalysts</b>                                                    | <b>Amount (mg)</b> | <b>Light source</b>        | <b>Concentration and volume of RhB</b> | <b>Efficiency (%)</b> | <b>Ref.</b> |
|--------------------------------------------------------------------------|--------------------|----------------------------|----------------------------------------|-----------------------|-------------|
| Pt/g-C <sub>3</sub> N <sub>4</sub>                                       | 10 mg              | 300W ( $\lambda > 420$ nm) | 10 mg · L <sup>-1</sup> , 50ml         | 85% (20 min)          | 1           |
| Cu/C /g-C <sub>3</sub> N <sub>4</sub>                                    | 50 mg              | 250W ( $\lambda > 420$ nm) | 10 mg · L <sup>-1</sup> , 50ml         | 97% (120 min)         | 2           |
| m-Fe/ g-C <sub>3</sub> N <sub>4</sub>                                    | 20 mg              | 500W ( $\lambda > 420$ nm) | 5 mg · L <sup>-1</sup> , 40ml          | 88% (2 h)             | 3           |
| Cu <sup>+</sup> /g-C <sub>3</sub> N <sub>4</sub>                         | 0.1 g              | 300/ ( $\lambda < 420$ nm) | 10 mg · L <sup>-1</sup> , 200ml        | 95.7% (30 min)        | 4           |
| GQDs/mpg-C <sub>3</sub> N <sub>4</sub>                                   | 25 mg              | 300W ( $\lambda > 420$ nm) | 10 mg · L <sup>-1</sup> , 50ml         | 97% (120 min)         | 5           |
| Ag/g-C <sub>3</sub> N <sub>4</sub>                                       | 10 mg              | 500W ( $\lambda < 420$ nm) | 10 mg · L <sup>-1</sup> , 25ml         | ≈99% (100 min)        | 6           |
| Ce/ g-C <sub>3</sub> N <sub>4</sub>                                      | 50 mg              | 250W ( $\lambda > 420$ nm) | 10 mg · L <sup>-1</sup> , 200ml        | ≈90% (120 min)        | 7           |
| CS@g-C <sub>3</sub> N <sub>4</sub> /MX                                   | 0.1 g              | 250W ( $\lambda > 420$ nm) | 50 mg · L <sup>-1</sup> , 20ml         | ≈99% (180 min)        | 8           |
| N-Ti <sub>3</sub> C <sub>2</sub> /porous g-C <sub>3</sub> N <sub>4</sub> | 15 mg              | 300W ( $\lambda > 420$ nm) | 20 mg · L <sup>-1</sup> , 30ml         | 97.5% (15 min)        | This work   |

Figure S1

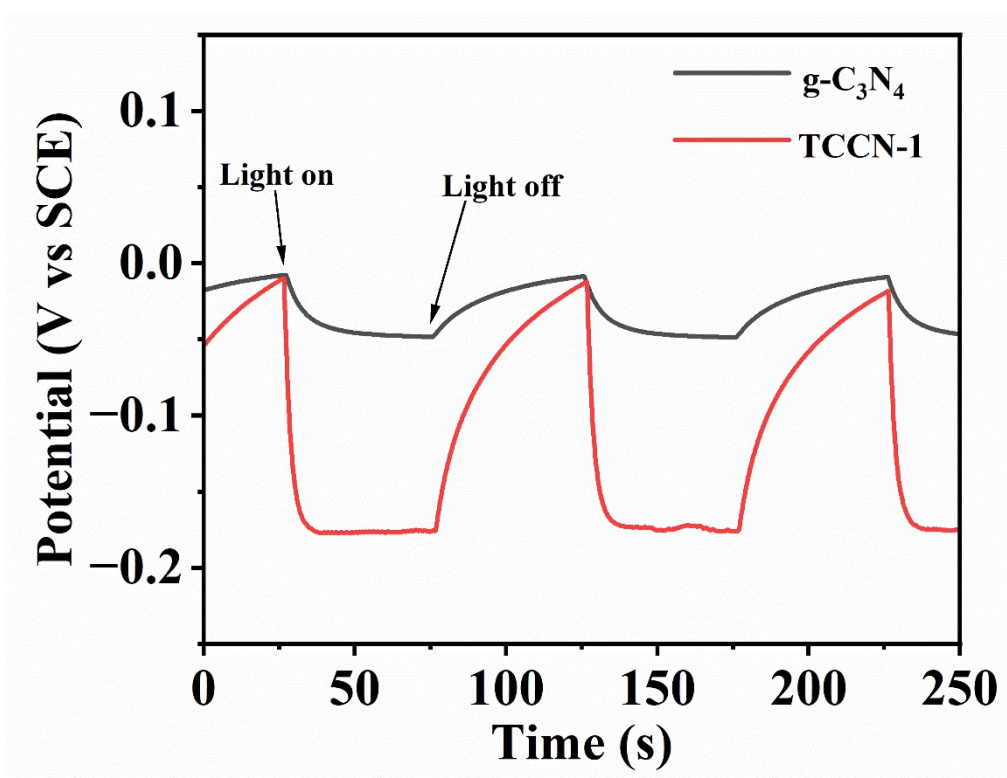

Figure S1 The transient photopotential for g-C<sub>3</sub>N<sub>4</sub> and TCCN-1

## Reference

- 1 X. Zhang, P. Wang, P. Yang and S. P. Jiang, *Int. J. Hydrogen Energy*, 2020, **45**, 21523–21531.
- 2 T. Zhang, W. Shao, C. Yu, R. Jiang, G. Wu, W. Xing and P. Li, *J. Inorg. Organomet P.*, 2022, **32**, 2260–2268.
- 3 J. Luo, Z.-J. Cui and G.-L. Zang, *J. Chem-ny*, 2013, **2013**, 1–6.
- 4 L. Yang, X. Ren, Y. Zhang and Z. Chen, *J. Environ. Chem. Eng.*, 2021, **9**, 106596.
- 5 J. Liu, H. Xu, Y. Xu, Y. Song, J. Lian, Y. Zhao, L. Wang, L. Huang, H. Ji and H. Li, *Appl. Catal. B-Environ energy*, 2017, **207**, 429–437.
- 6 K. Qi, Y. Li, Y. Xie, S. Liu, K. Zheng, Z. Chen and R. Wang, *Front. Chem.*, 2019, **7**, 91.
- 7 R. Jin, S. Hu, J. Gui and D. Liu, *B. Korean Chem. Soc.*, 2015, **36**, 17–23.
- 8 S. Vigneshwaran, P. Karthikeyan, C. M. Park and S. Meenakshi, *J. Environ. Manage.*, 2020, **273**, 111125.
